# Supplementary material for: Novel Method for Early Prediction of Clinically Significant Drug–Drug Interactions with a Machine Learning Algorithm Based on Risk Matrix Analysis in the NICU
Source: MDPI journal article supplement (doi:10.3390/jcm11164715), 2022-08-12
Supplement: s1 [file s1]

**Table S1.** Distribution of drugs used by patients included in the study (n = 2280).

| Drugs |                                      |     |       | Drugs |                                                   |   |      |
|-------|--------------------------------------|-----|-------|-------|---------------------------------------------------|---|------|
|       |                                      | n   | %     |       |                                                   | n | %    |
| 1.    | Intravenous fluids <sup>A</sup>      | 275 | 12.06 | 67.   | Hydrochlorothiazide + spironolactone <sup>C</sup> | 4 | 0.18 |
| 2.    | Gentamicin <sup>J</sup>              | 183 | 8.03  | 68.   | Terlipressin <sup>H</sup>                         | 3 | 0.13 |
| 3.    | Ampicillin <sup>J</sup>              | 178 | 7.81  | 69.   | Amiodarone <sup>C</sup>                           | 2 | 0.09 |
| 4.    | Vitamin K <sup>B</sup>               | 134 | 5.88  | 70.   | Azithromycin <sup>J</sup>                         | 2 | 0.09 |
| 5.    | Multivitamin <sup>A</sup>            | 121 | 5.30  | 71.   | Calcium lactat <sup>A</sup>                       | 2 | 0.09 |
| 6.    | Amikacin <sup>J</sup>                | 119 | 5.22  | 72.   | Zinc formulation <sup>A</sup>                     | 2 | 0.09 |
| 7.    | Vankomycin <sup>J</sup>              | 115 | 5.04  | 73.   | Fibrinogen <sup>B</sup>                           | 2 | 0.09 |
| 8.    | Meropenem <sup>J</sup>               | 112 | 4.91  | 74.   | Filgrastim <sup>L</sup>                           | 2 | 0.09 |
| 9.    | Fluconazole <sup>J</sup>             | 111 | 4.87  | 75.   | Flecainide <sup>C</sup>                           | 2 | 0.09 |
| 10.   | Dexmedetomidine <sup>N</sup>         | 59  | 2.59  | 76.   | Heparin <sup>B</sup>                              | 2 | 0.09 |
| 11.   | Vitamin D <sup>A</sup>               | 49  | 2.15  | 77.   | Calcitriol <sup>A</sup>                           | 2 | 0.09 |
| 12.   | Fentanyl <sup>N</sup>                | 46  | 2.02  | 78.   | Carnitine <sup>A</sup>                            | 2 | 0.09 |
| 13.   | Caffeine <sup>N</sup>                | 43  | 1.89  | 79.   | Colistin <sup>J</sup>                             | 2 | 0.09 |
| 14.   | Surfactant preparations <sup>R</sup> | 43  | 1.89  | 80.   | Pancrelipase <sup>H</sup>                         | 2 | 0.09 |
| 15.   | Probiotics <sup>A</sup>              | 30  | 1.32  | 81.   | Sodium benzoate <sup>A</sup>                      | 2 | 0.09 |
| 16.   | Midazolam <sup>N</sup>               | 30  | 1.32  | 82.   | Netilmicin eyedrop <sup>S</sup>                   | 2 | 0.09 |
| 17.   | Dexamethasone <sup>H</sup>           | 28  | 1.23  | 83.   | Nifedipine <sup>C</sup>                           | 2 | 0.09 |
| 18.   | Dopamine <sup>C</sup>                | 27  | 1.18  | 84.   | Octreotide <sup>H</sup>                           | 2 | 0.09 |
| 19.   | Furosemid <sup>C</sup>               | 26  | 1.14  | 85.   | Ornidazole <sup>J</sup>                           | 2 | 0.09 |
| 20.   | Salbutamol <sup>R</sup>              | 26  | 1.14  | 86.   | Piperacillin-tazobactam <sup>J</sup>              | 2 | 0.09 |
| 21.   | Calcium Gluconate <sup>A</sup>       | 25  | 1.10  | 87.   | Sodium citrate-citric acid solution <sup>A</sup>  | 2 | 0.09 |
| 22.   | Potassium chloride <sup>A</sup>      | 25  | 1.10  | 88.   | Spironolactone <sup>C</sup>                       | 2 | 0.09 |
| 23.   | Vitamin A <sup>A</sup>               | 23  | 1.01  | 89.   | Teicoplanine <sup>J</sup>                         | 2 | 0.09 |
| 24.   | Phenobarbital <sup>N</sup>           | 22  | 0.96  | 90.   | Ophthalmic lubricant <sup>S</sup>                 | 2 | 0.09 |
| 25.   | Cefazolin <sup>J</sup>               | 20  | 0.88  | 91.   | Topiramate <sup>S</sup>                           | 2 | 0.09 |
| 26.   | Alprostadil <sup>C</sup>             | 19  | 0.83  | 92.   | Tropicamide eyedrop <sup>S</sup>                  | 2 | 0.09 |
| 27.   | Hydrocortisone <sup>H</sup>          | 15  | 0.66  | 93.   | Ursodiol <sup>A</sup>                             | 2 | 0.09 |
| 28.   | Milrinone <sup>C</sup>               | 15  | 0.66  | 94.   | Sodium bicarbonate <sup>A</sup>                   | 2 | 0.08 |
| 29.   | Metronidazole <sup>J</sup>           | 13  | 0.57  | 95.   | Amlodipine <sup>C</sup>                           | 1 | 0.04 |
| 30.   | Adrenaline <sup>C</sup>              | 12  | 0.53  | 96.   | Bleomycin <sup>L</sup>                            | 1 | 0.04 |
| 31.   | Amoxicillin <sup>J</sup>             | 12  | 0.53  | 97.   | Dekas <sup>A</sup>                                | 1 | 0.04 |
| 32.   | Enoxaparin <sup>B</sup>              | 12  | 0.53  | 98.   | Desmopressin <sup>H</sup>                         | 1 | 0.04 |
| 33.   | Ciprofloxacin <sup>J</sup>           | 12  | 0.53  | 99.   | Diazepam <sup>N</sup>                             | 1 | 0.04 |
| 34.   | Allopurinol <sup>M</sup>             | 11  | 0.48  | 100.  | Dorzolamide eyedrop <sup>S</sup>                  | 1 | 0.04 |
| 35.   | Sodium chloride <sup>A</sup>         | 11  | 0.48  | 101.  | Etopozid <sup>L</sup>                             | 1 | 0.04 |
| 36.   | Tobramycin <sup>S</sup>              | 11  | 0.48  | 102.  | Phenylephrine <sup>S</sup>                        | 1 | 0.04 |
| 37.   | Ferrous fumarate <sup>B</sup>        | 10  | 0.44  | 103.  | Enema <sup>S</sup>                                | 1 | 0.04 |
| 38.   | Levetiracetam <sup>N</sup>           | 10  | 0.44  | 104.  | Fludarabine <sup>L</sup>                          | 1 | 0.04 |
| 39.   | Ibuprofen <sup>C</sup>               | 9   | 0.39  | 105.  | Aluminum hydroxide <sup>A</sup>                   | 1 | 0.04 |
| 40.   | Morphine <sup>N</sup>                | 9   | 0.39  | 106.  | Glucagon <sup>H</sup>                             | 1 | 0.04 |
| 41.   | Propranolol <sup>C</sup>             | 9   | 0.39  | 107.  | Iloprost <sup>B</sup>                             | 1 | 0.04 |
| 42.   | Diazoxide <sup>C</sup>               | 8   | 0.35  | 108.  | Imipenem <sup>J</sup>                             | 1 | 0.04 |
| 43.   | Levothyroxine <sup>H</sup>           | 8   | 0.35  | 109.  | Immune globulin <sup>B</sup>                      | 1 | 0.04 |
| 44.   | Sildenafil <sup>G</sup>              | 8   | 0.35  | 110.  | Cabergoline <sup>G</sup>                          | 1 | 0.04 |
| 45.   | Adenosine <sup>C</sup>               | 7   | 0.31  | 111.  | Potassium citrate <sup>A</sup>                    | 1 | 0.04 |
| 46.   | Hydrochlorothiazide <sup>C</sup>     | 7   | 0.31  | 112.  | Activated charcoal <sup>A</sup>                   | 1 | 0.04 |
| 47.   | Captopril <sup>C</sup>               | 7   | 0.31  | 113.  | Carboplatin <sup>L</sup>                          | 1 | 0.04 |
| 48.   | Acetylcysteine <sup>R</sup>          | 7   | 0.31  | 114.  | Ketamine <sup>N</sup>                             | 1 | 0.04 |
| 49.   | Acetylsalicylic acid <sup>B</sup>    | 6   | 0.26  | 115.  | Latanoprost eyedrop <sup>S</sup>                  | 1 | 0.04 |
| 50.   | Albumin <sup>B</sup>                 | 5   | 0.22  | 116.  | Medroxyprogesterone acetate <sup>G</sup>          | 1 | 0.04 |
| 51.   | Dornase alpha <sup>R</sup>           | 5   | 0.22  | 117.  | Magnesium sulphate <sup>A</sup>                   | 1 | 0.04 |
| 52.   | Insulin <sup>H</sup>                 | 5   | 0.22  | 118.  | Mesenchymal stem cell <sup>B</sup>                | 1 | 0.04 |
| 53.   | Penicillin G <sup>J</sup>            | 5   | 0.22  | 119.  | Mupirocin <sup>S</sup>                            | 1 | 0.04 |

|     |                                     |   |      |       |                              |      |      |
|-----|-------------------------------------|---|------|-------|------------------------------|------|------|
| 54. | Dexamethasone eyedrop <sup>S</sup>  | 4 | 0.18 | 120.  | Nitroglycerine <sup>C</sup>  | 1    | 0.04 |
| 55. | Phenytoin <sup>N</sup>              | 4 | 0.18 | 121.  | Oseltamivir <sup>J</sup>     | 1    | 0.04 |
| 56. | Linezolid <sup>J</sup>              | 4 | 0.18 | 122.  | Pantoprazole <sup>A</sup>    | 1    | 0.04 |
| 57. | Methylprednisolone <sup>H</sup>     | 4 | 0.18 | 123.  | Prednisolone <sup>H</sup>    | 1    | 0.04 |
| 58. | Paracetamol <sup>N</sup>            | 4 | 0.18 | 124.  | Pyridoxine <sup>A</sup>      | 1    | 0.04 |
| 59. | Ranitidine <sup>A</sup>             | 4 | 0.18 | 125.  | Ceftriaxone <sup>J</sup>     | 1    | 0.04 |
| 60. | Ampicillin + sulbactam <sup>J</sup> | 4 | 0.18 | 126.  | Cefuroxime <sup>J</sup>      | 1    | 0.04 |
| 61. | Biotin <sup>A</sup>                 | 3 | 0.13 | 127.  | Sotalol <sup>C</sup>         | 1    | 0.04 |
| 62. | Levosimendan <sup>C</sup>           | 3 | 0.13 | 128.  | Tranexamic acid <sup>B</sup> | 1    | 0.04 |
| 63. | Methylene blue <sup>C</sup>         | 3 | 0.13 | 129.  | Vinblastine <sup>L</sup>     | 1    | 0.04 |
| 64. | Nitrofurazone <sup>S</sup>          | 3 | 0.13 | 130.  | Vitamin B <sup>A</sup>       | 1    | 0.04 |
| 65. | Noradrenaline <sup>C</sup>          | 3 | 0.13 | 131.  | Vitamin C <sup>A</sup>       | 1    | 0.04 |
| 66. | Cefotaxime <sup>J</sup>             | 3 | 0.13 | Total |                              | 2280 | 100  |

<sup>A</sup>. Alimentary tract and metabolism, <sup>B</sup>. Blood and blood-forming organs, <sup>C</sup>. Cardiovascular system, <sup>G</sup>. Genito-urinary system and sex hormones, <sup>H</sup>. Systemic hormonal preparations, <sup>J</sup>. Anti-infectives for systemic use, <sup>L</sup>. Antineoplastic and immunomodulating agents, <sup>M</sup>. Musculo-skeletal system, <sup>N</sup>. Nervous system, <sup>R</sup>. Respiratory system, <sup>S</sup>. Sensory organs.
